# Supplementary material
Source: PubMed Central journal article supplement (PMC8388574)

# Advanced Strategies for Proton Transfer Reactions Coupled with Parallel Ion Parking on a 21 T FT-ICR MS for Intact Protein Analysis

Chad R. Weisbrod<sup>1†‡</sup>, Lissa C. Anderson<sup>1‡</sup>, Christopher L. Hendrickson<sup>1</sup>, Leah V. Schaffer<sup>2</sup>, Michael R. Shortreed<sup>2</sup>, Lloyd M. Smith<sup>2</sup>, Jeffrey Shabanowitz<sup>3</sup>, Donald F. Hunt<sup>3</sup>

1. Ion Cyclotron Resonance Program, National High Magnetic Field Laboratory, 1800 E. Paul Dirac Dr., Tallahassee, FL 32310
2. Department of Chemistry, University of Wisconsin-Madison, 1101 University Ave., Madison, WI 53706
3. Department of Chemistry, University of Virginia, Charlottesville, VA 22904

‡ Author's contributed equally to this work

† Corresponding Author

Corresponding Author Email: [weisbrod@magnet.fsu.edu](mailto:weisbrod@magnet.fsu.edu)

## **Supplemental Figures Description**

**Figure S1-S3** Direct-infusion of apomyoglobin subject to PTR-MS<sup>1</sup>. These data illustrate that this experiment is stable over long-periods, such that it would be amenable to usage during LC-MS analysis. The mass spectrum (bottom inset) in each of the three figures shows the PTR products at the beginning (1), middle (2), and end (3) of a 74 min. acquisition period.

**Figure S4** Statistical analysis of the base peak ( $[M+12H]^{12+}$ ; apomyoglobin) observed during the experiment outlined in Supplemental Figure 1-3. The histogram of ion intensities is roughly Gaussian and is shown to have a %RSD = 19.7.

**Figure S5A-B** Fragment ion maps of generated from the tandem MS spectra of protein AG  $[M+50H]^{50+}$  under ETD (A) and ETD-PTR (B) conditions.

**Figure S6** PTR-PIP tandem MS spectra obtained from the isolation of the apomyoglobin  $[M+21H]^{21+}$ . A) was obtained under normal PIP waveform conditions. B) was acquired under rapid PIP waveform conditions. The desired charge state for parking as the  $[M+14H]^{14+}$ .

**Figure S7** Reaction progress plots which track the abundance of precursor ion (apomyoglobin  $[M+21H]^{21+}$ ), charged reduced species, and the TIC during PTR under A) normal ion parking and B) rapid ion parking as a function of reaction time. These plots illustrate that while rapid ion parking proceed at 5-10x the reaction rate the reaction efficiency is unaffected. Because PTR consumes charge, undergoing 7 generations of PTR to park the  $[M+14H]^{14+}$  imposes the maximum efficiency at 66% the signal abundance of the isolated precursor.

**Figure S8** High resolution reagent ion spectra analyzed within the FT-ICR. These spectra were acquired after PIP waveforms were applied within the linear RF ion trap at A) 0.00, B) 0.020, and C) 0.065 reagent anion parking amplitudes. From these data, the loss of fluorine is evident within C) resultant from the elevated reagent anion parking amplitude.

**Figure S9** A zoomed inset from Supplemental Figure 8C illustrating the mass loss is consistent with the loss of a single fluorine from the parent ion.

**Figure S10** A plot of the intact reagent anion (PFMD) and the fluorine loss fragment (PFMD-F) as a function of reaction time under various reagent anion parking amplitudes. These data illustrate how the PFMD-F are temporally generated as PTR-PIP reactions proceed.

**Figure S11** Reaction rate vs reagent parking amplitude. Regions labeled for their observed parking efficiency.

**Figure S12** Reaction rate as determined from the precursor ion decay under normal ion parking, rapid ion parking, and uncontrolled PTR.

# Figure S1

Myoglobin\_MS2\_CID\_850mz\_800DaWide\_Par...  
0.02 rgntAmp; 0.09 prodAmp; 300 ms Rxn Time

10/02/18 15:44:08

RT: 0.00 - 74.23

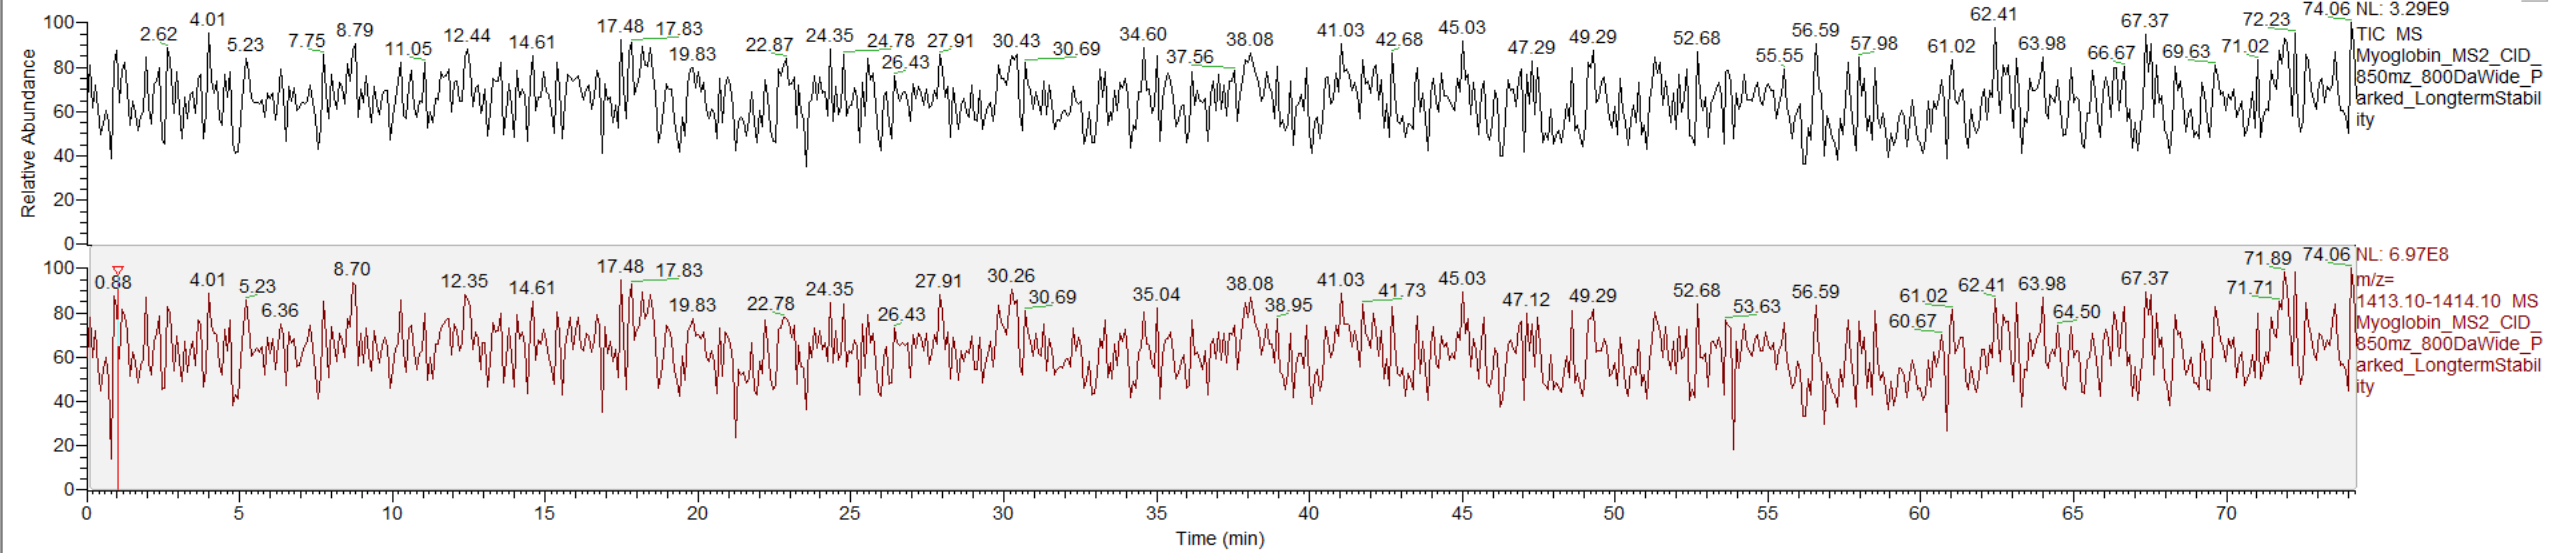

Myoglobin\_MS2\_CID\_850mz\_800DaWide\_Parked\_LongtermStability #12 RT: 0.97 AV: 1 NL: 6.78E7  
T: FTMS + p NSI Full ms2 850.00@ptr300.00 [300.00-2000.00]

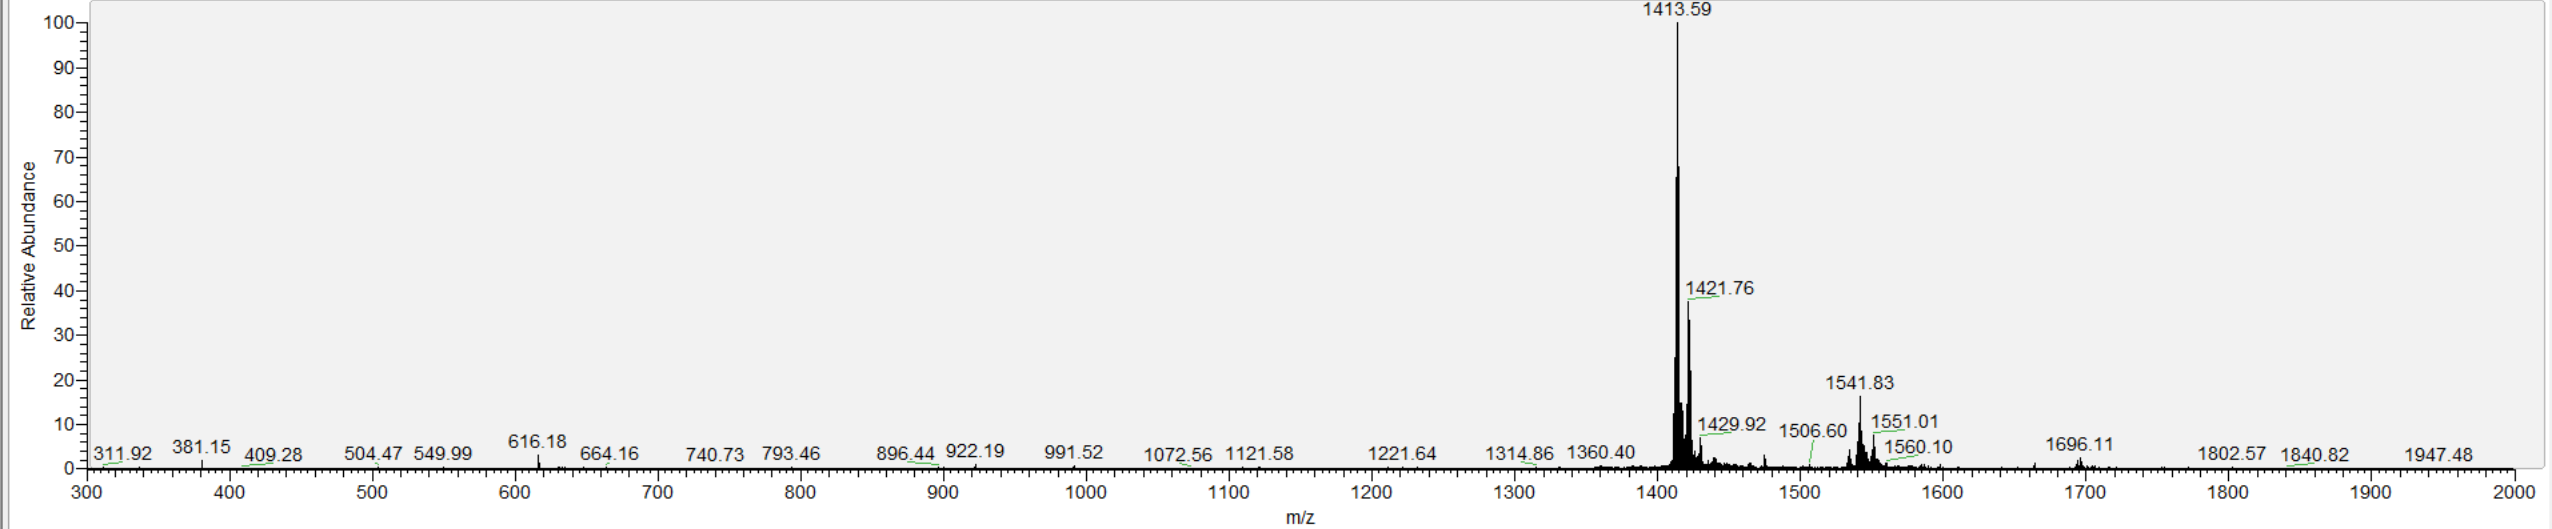

# Figure S2

Myoglobin\_MS2\_CID\_850mz\_800DaWide\_Par... 10/02/18 15:44:08  
0.02 rgntAmp; 0.09 prodAmp; 300 ms Rxn Time

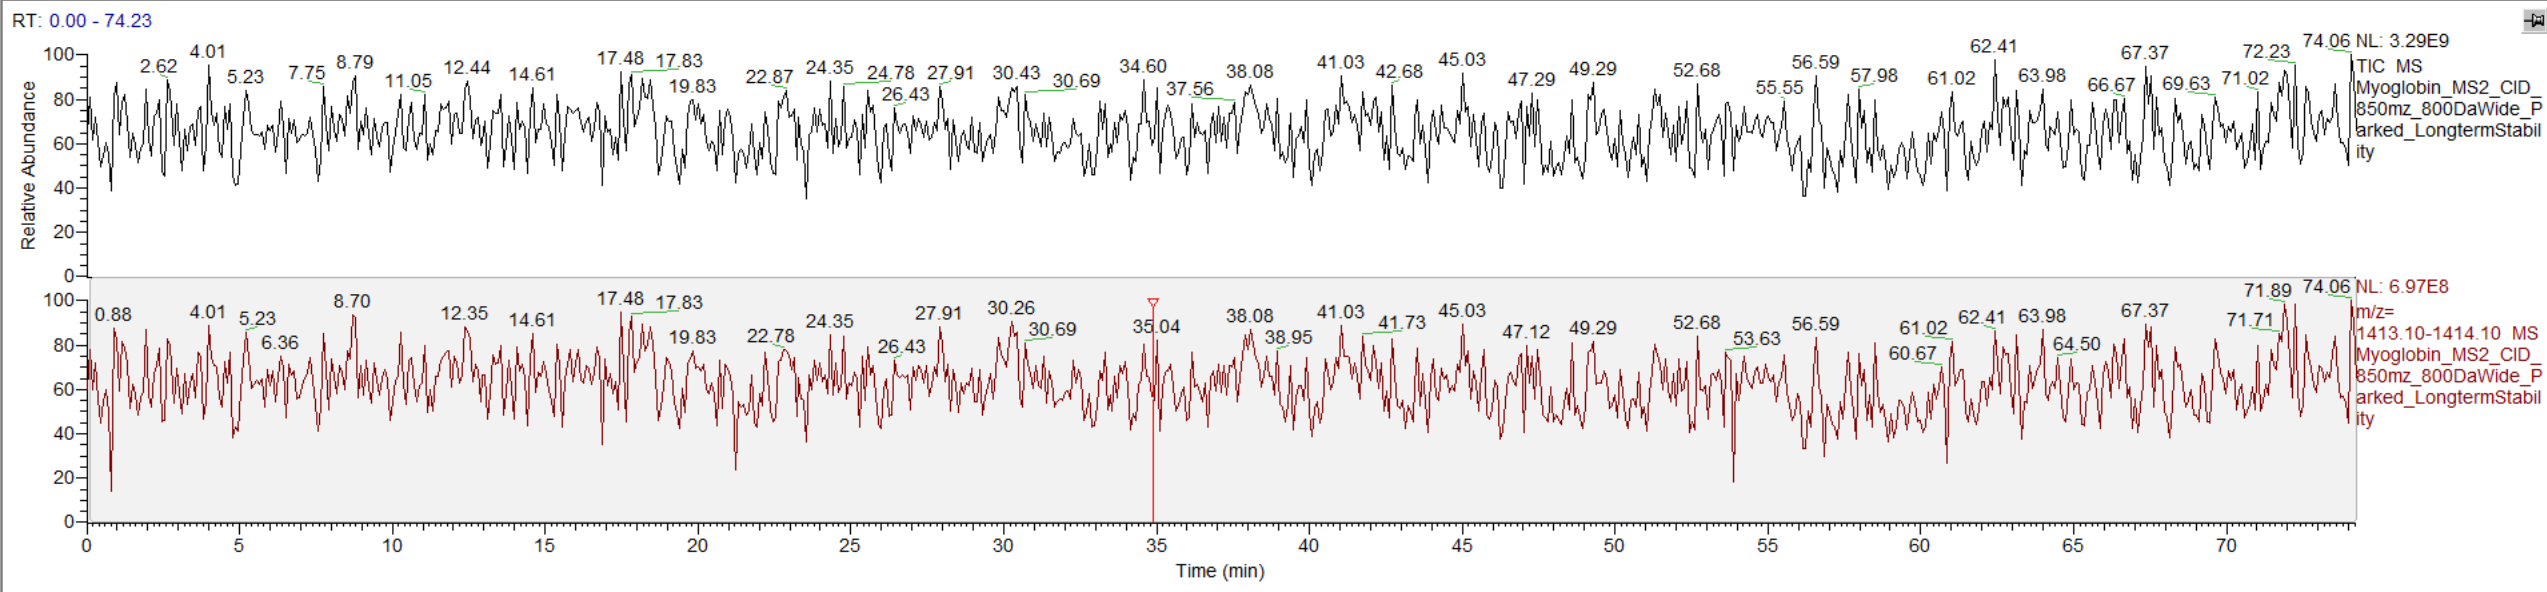

Myoglobin\_MS2\_CID\_850mz\_800DaWide\_Parked\_LongtermStability #402 RT: 34.86 AV: 1 NL: 4.88E7  
T: FTMS + p NSI Full ms2 850.00@ptr300.00 [300.00-2000.00]

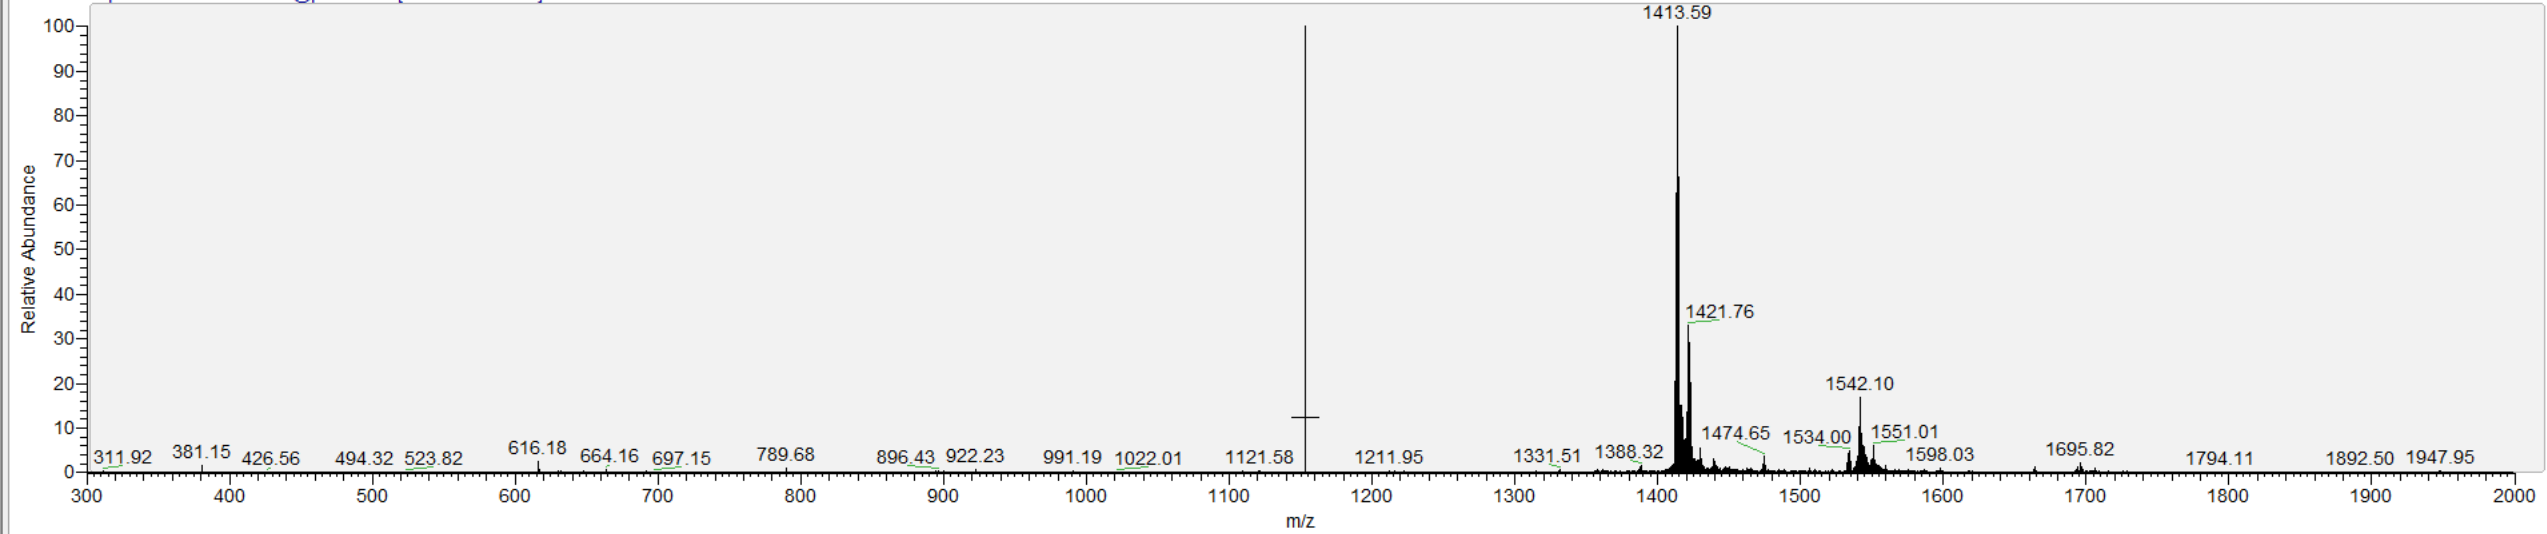

# Figure S3

Myoglobin\_MS2\_CID\_850mz\_800DaWide\_Par... 10/02/18 15:44:08  
0.02 rgntAmp; 0.09 prodAmp; 300 ms Rxn Time

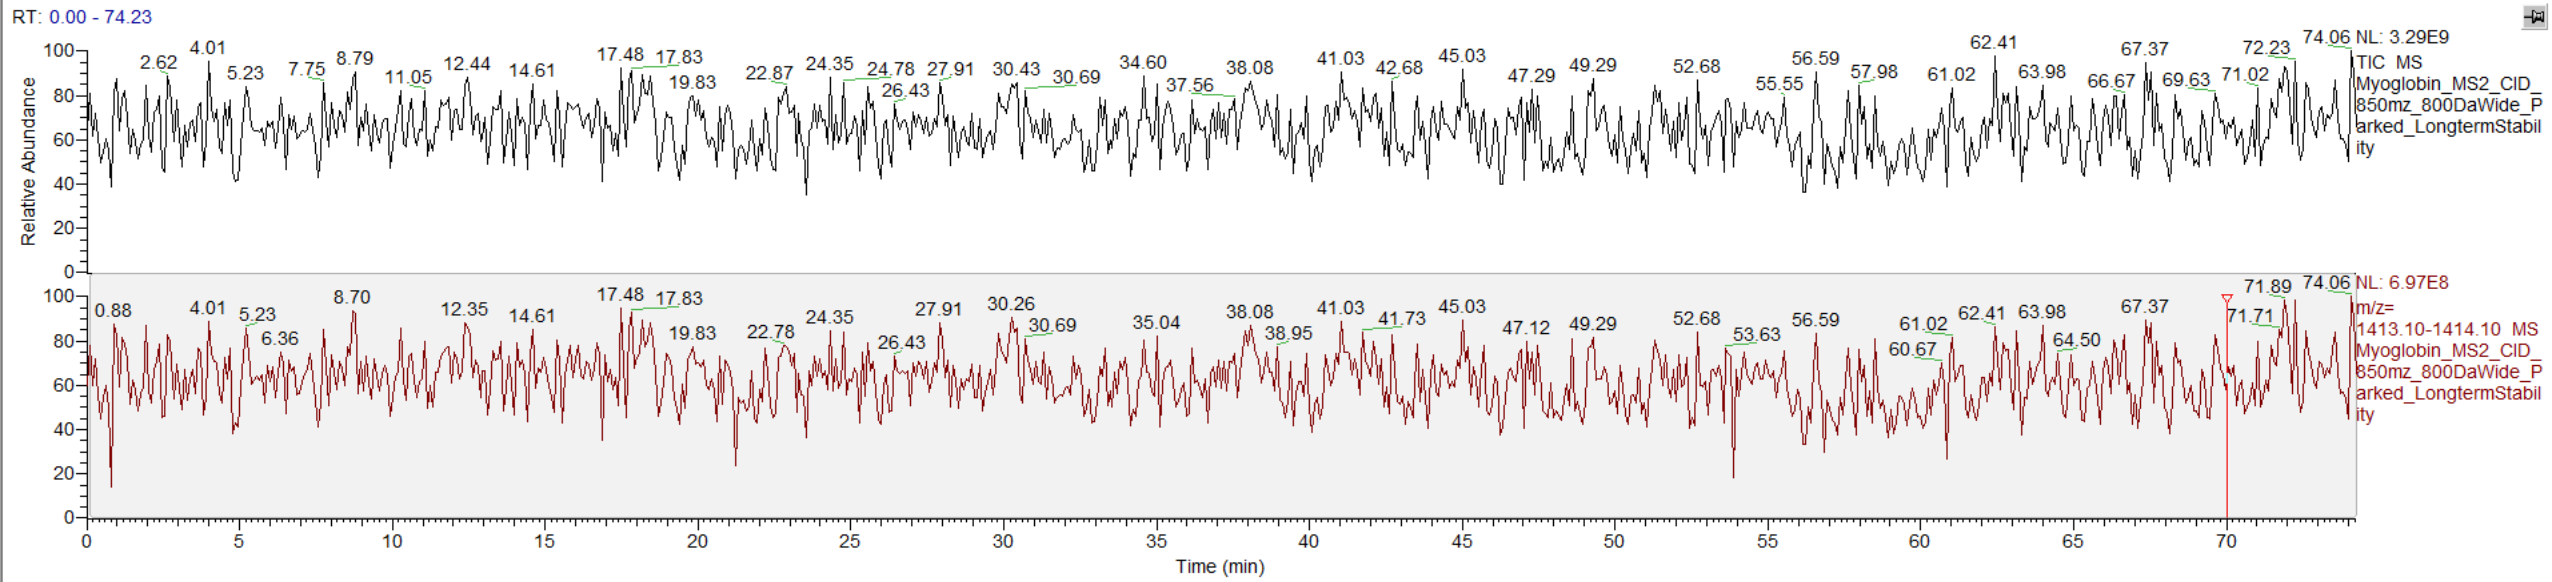

Myoglobin\_MS2\_CID\_850mz\_800DaWide\_Parked\_LongtermStability #806 RT: 69.97 AV: 1 NL: 4.73E7  
T: FTMS + p NSI Full ms2 850.00@ptr300.00 [300.00-2000.00]

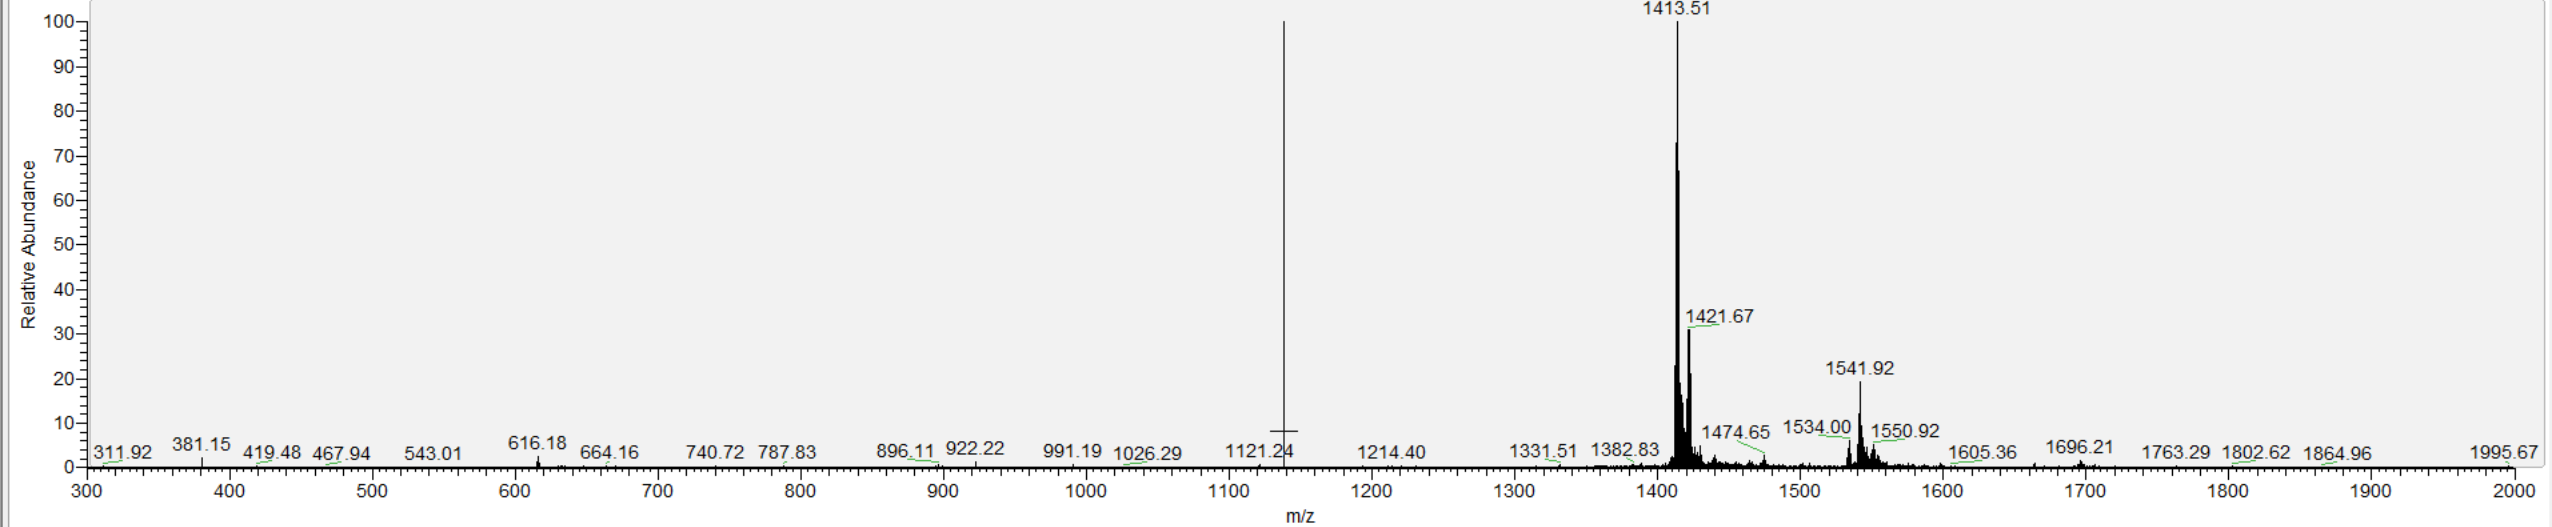

Figure S4

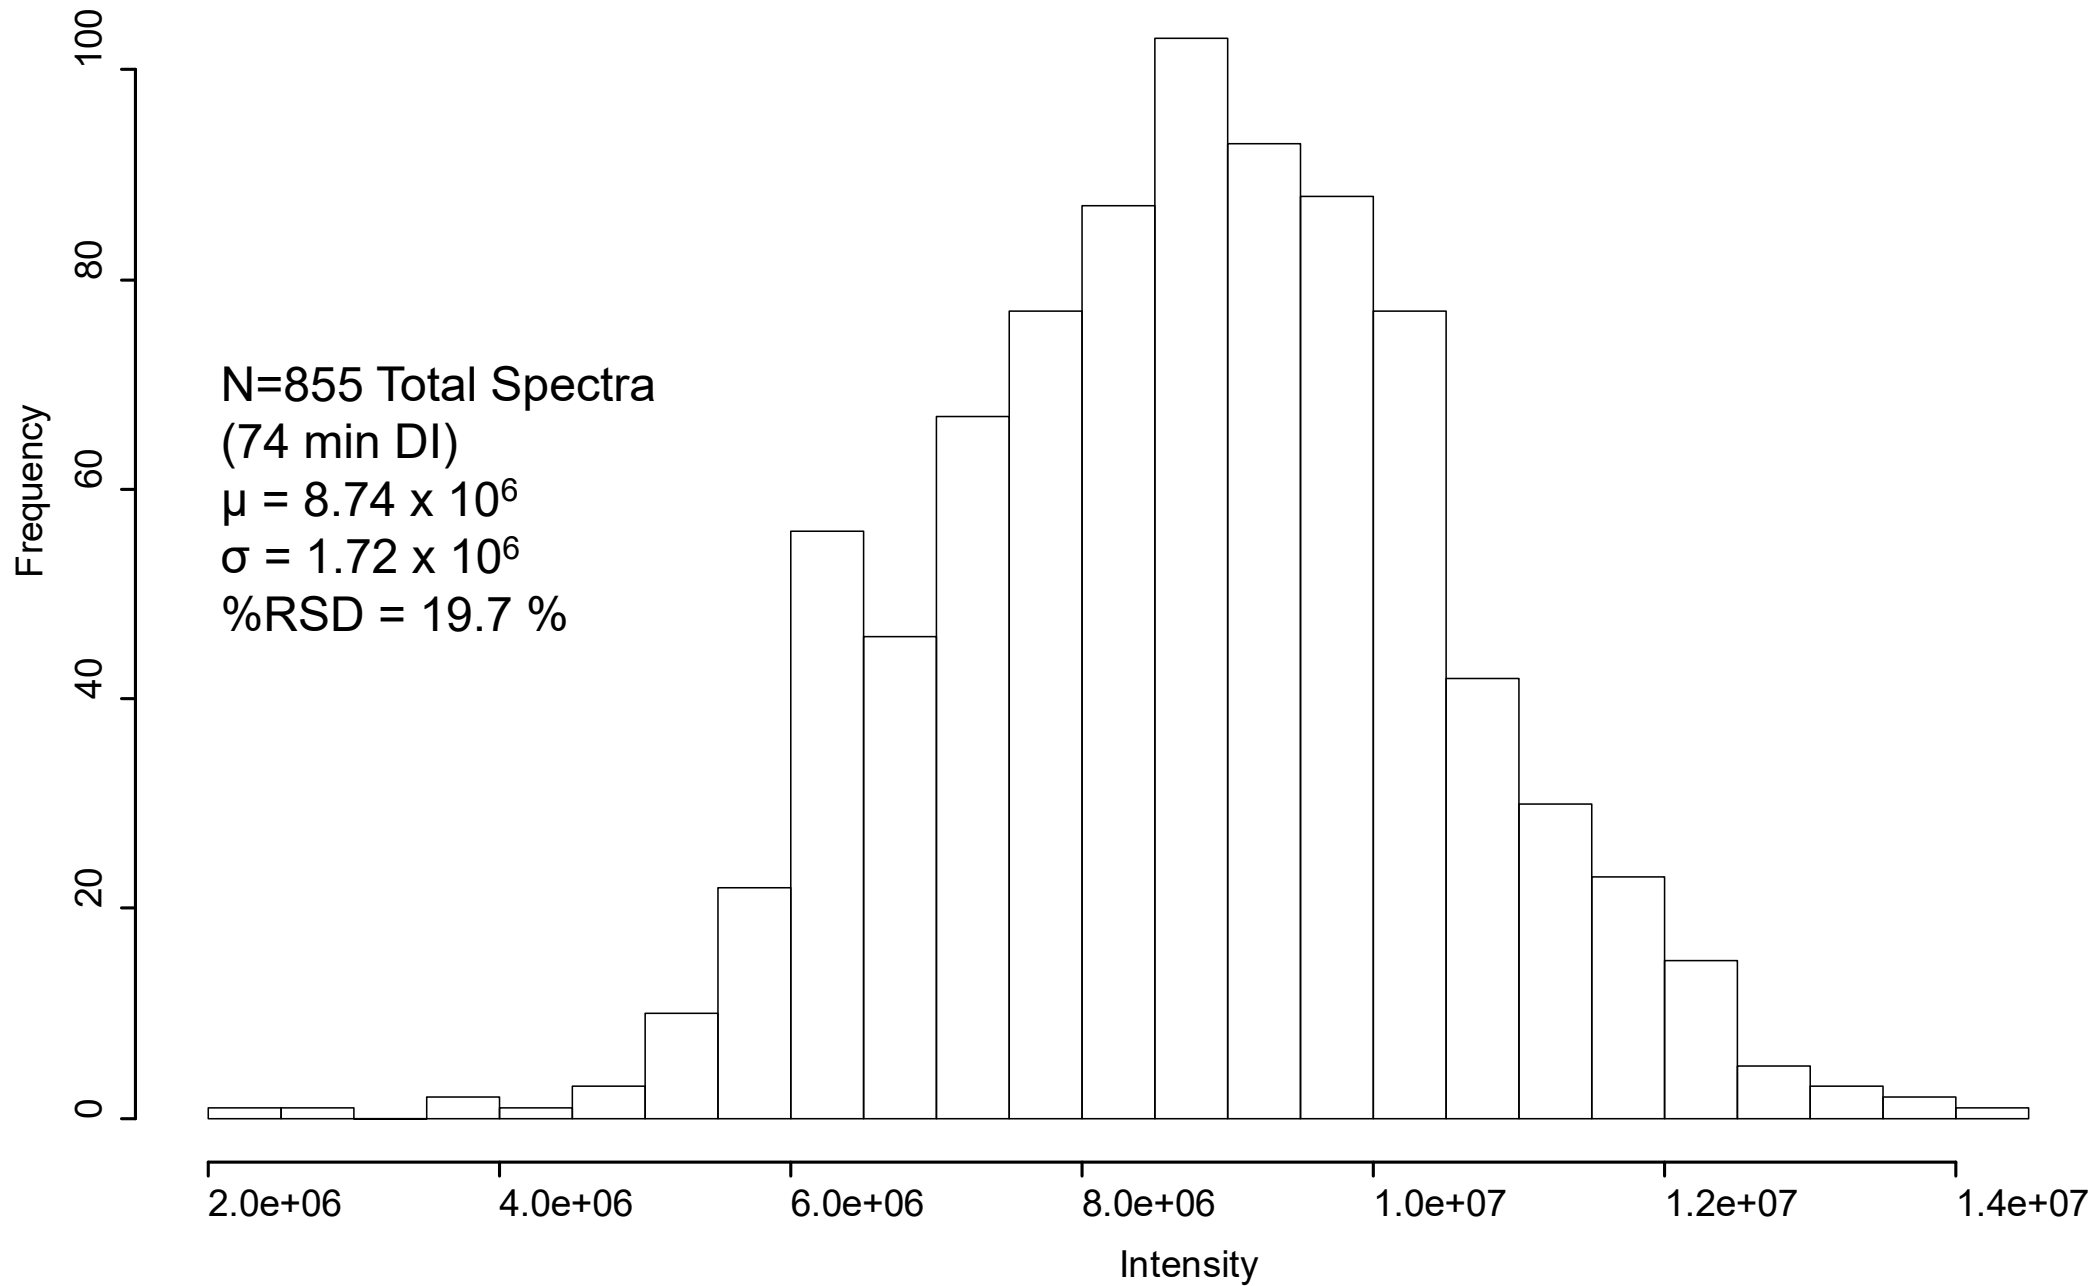

**Figure S5****A)**

N A Q H D E A Q Q N A F Y Q V L N M P N L N A D Q R 25  
26 N G F I Q S L K D D P S Q S A N V L G E A Q K L N 50  
51 D S Q A P K A D A Q Q N N F N K D Q Q S A F Y E I 75  
76 L N M P N L N E A Q R N G F I Q S L K D D P S Q S 100  
101 T N V L G E A K K L N E S Q A P K A D N N F N K E 125  
126 Q Q N A F Y E I L N M P N L N E E Q R N G F I Q S 150  
151 L K D D P S Q S A N L L S E A K K L N E S Q A P K 175  
176 A D N K F N K E Q Q N A F Y E I L H L P N L N E E 200  
201 Q R N G F I Q S L K D D P S Q S A N L L A E A K K 225  
226 L N D A Q A P K A D N K F N K E Q Q N A F Y E I L 250  
251 H L P N L T E E Q R N G F I Q S L K D D P S V S K 275  
276 E I L A E A K K L N D A Q A P K E E D N N K P I E 300  
301 G R N S R G S V D A S E L T P A V T T Y K L V I N 325  
326 G K T L K G E T T T E A V D A A T A E K V F K Q Y 350  
351 A N D N G V D G E W T Y D D A T K T F T V T E K P 375  
376 E V I D A S E L T P A V T T Y K L V I N G K T L K 400  
401 G E T T T K A V D A E T A E K A F K Q Y A N D N G 425  
426 V D G V W T Y D D A T K T F T V T E M V T E V P L 450  
451 E S T A C

**B)**

N A Q H D E A Q Q N A F Y Q V L N M P N L N A D Q R 25  
26 N G F I Q S L K D D P S Q S A N V L G E A Q K L N 50  
51 D S Q A P K A D A Q Q N N F N K D Q Q S A F Y E I 75  
76 L N M P N L N E A Q R N G F I Q S L K D D P S Q S 100  
101 T N V L G E A K K L N E S Q A P K A D N N F N K E 125  
126 Q Q N A F Y E I L N M P N L N E E Q R N G F I Q S 150  
151 L K D D P S Q S A N L L S E A K K L N E S Q A P K 175  
176 A D N K F N K E Q Q N A F Y E I L H L P N L N E E 200  
201 Q R N G F I Q S L K D D P S Q S A N L L A E A K K 225  
226 L N D A Q A P K A D N K F N K E Q Q N A F Y E I L 250  
251 H L P N L T E E Q R N G F I Q S L K D D P S V S K 275  
276 E I L A E A K K L N D A Q A P K E E D N N K P I E 300  
301 G R N S R G S V D A S E L T P A V T T Y K L V I N 325  
326 G K T L K G E T T T E A V D A A T A E K V F K Q Y 350  
351 A N D N G V D G E W T Y D D A T K T F T V T E K P 375  
376 E V I D A S E L T P A V T T Y K L V I N G K T L K 400  
401 G E T T T K A V D A E T A E K A F K Q Y A N D N G 425  
426 V D G V W T Y D D A T K T F T V T E M V T E V P L 450  
451 E S T A C

**Figure S6**

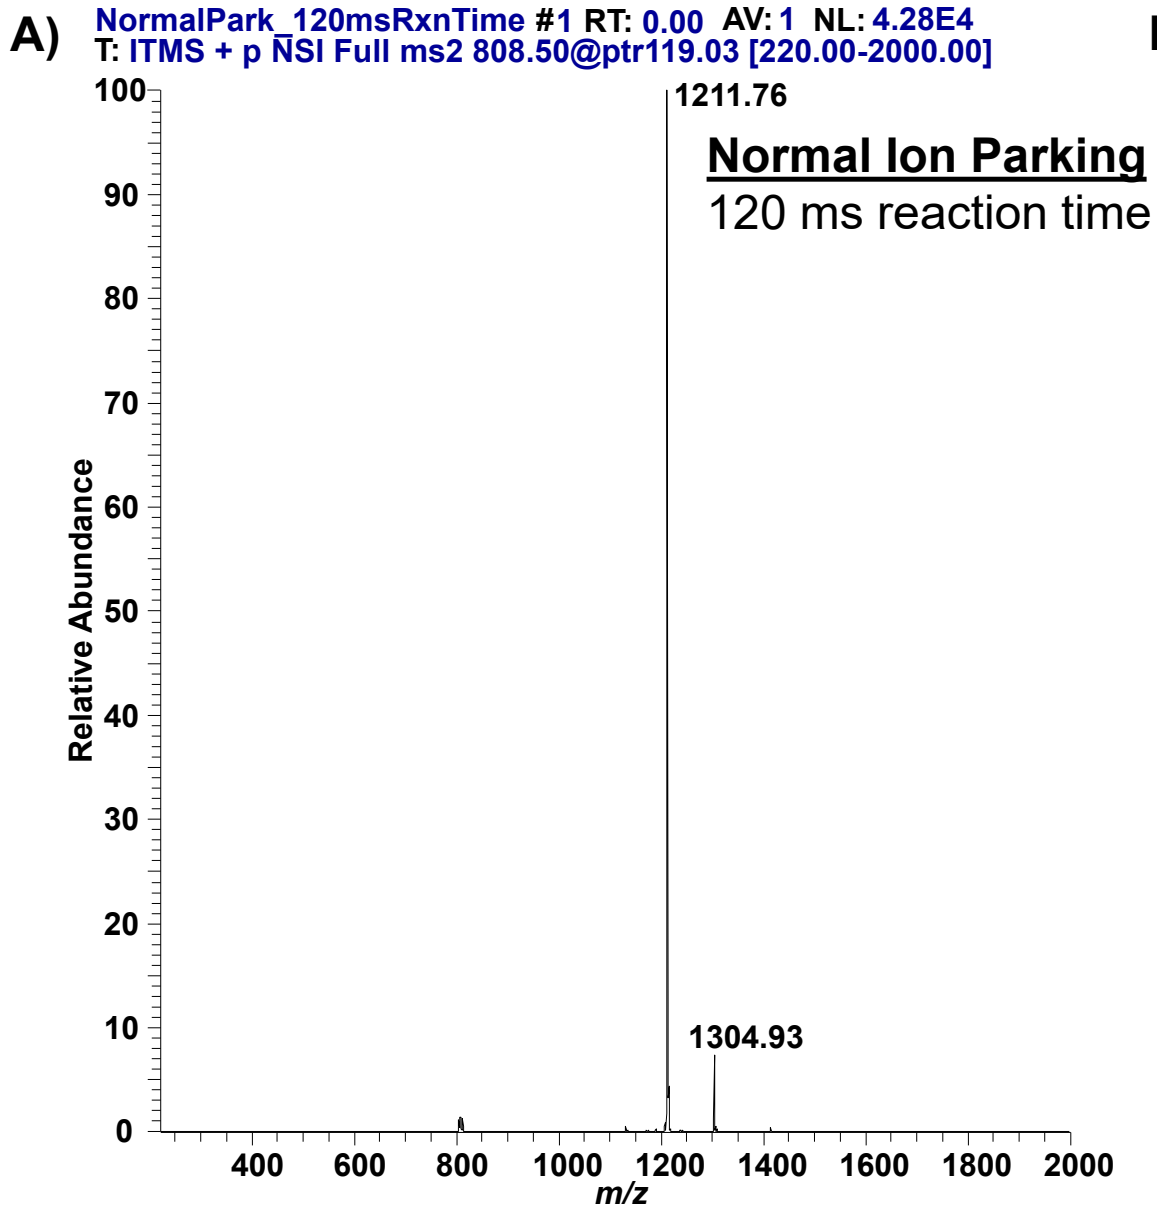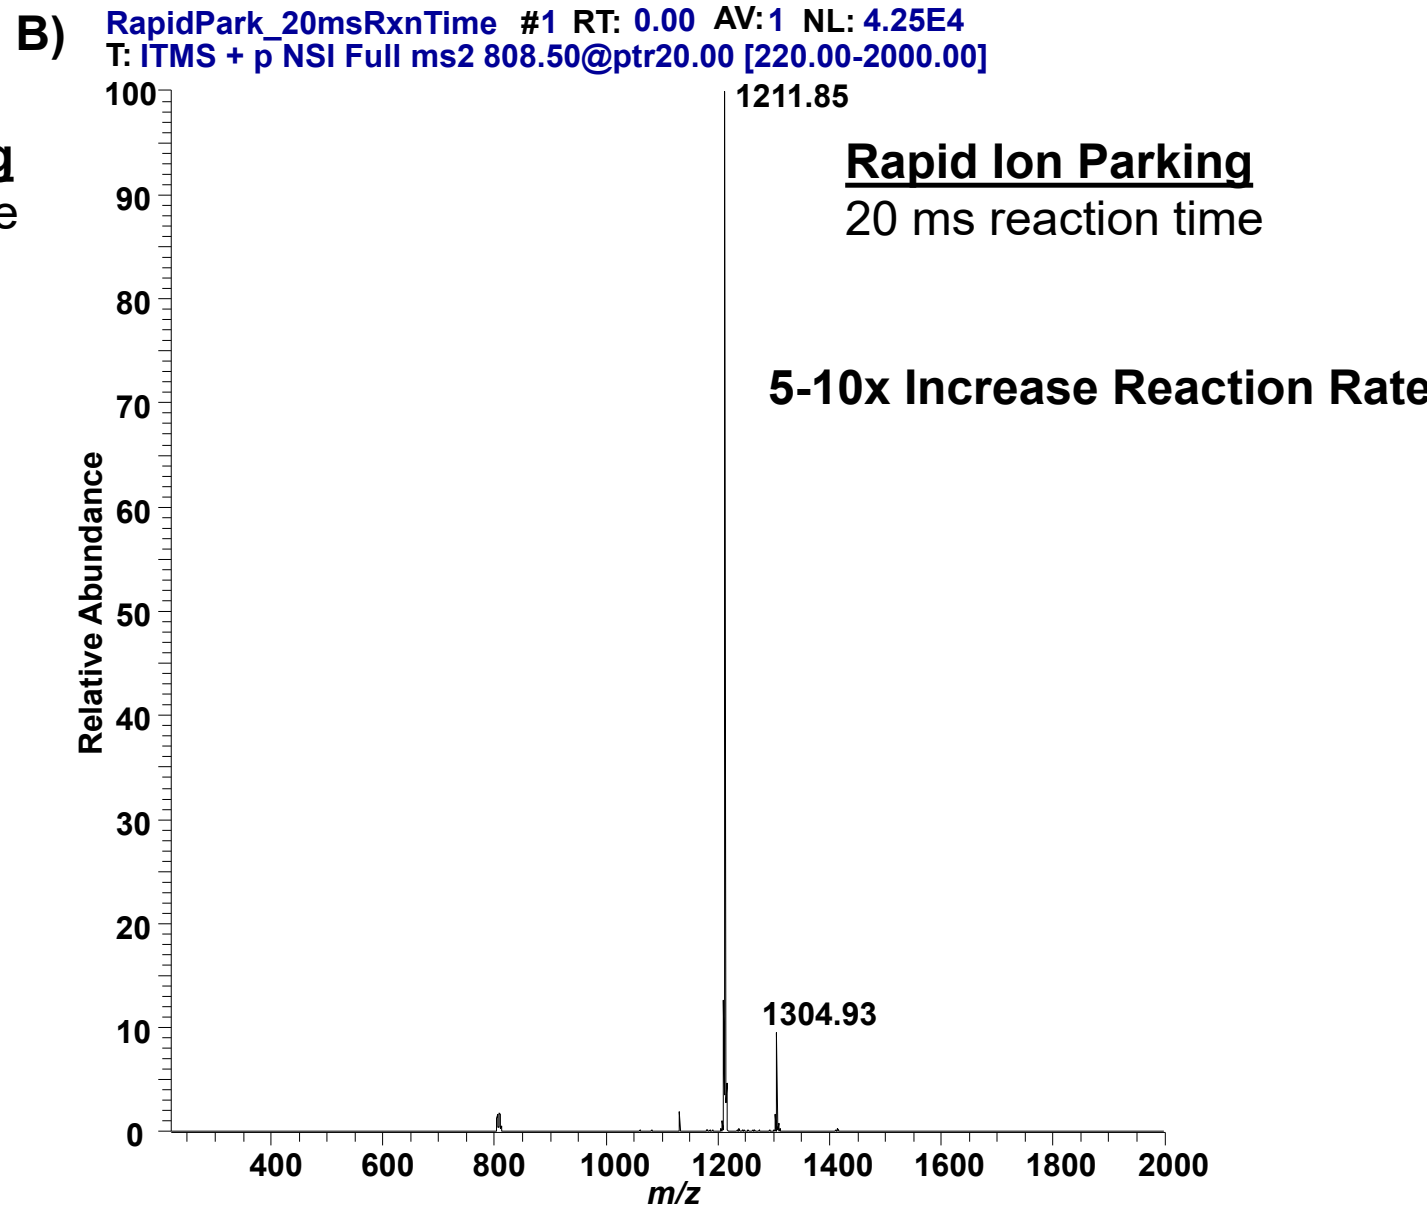



Figure S7

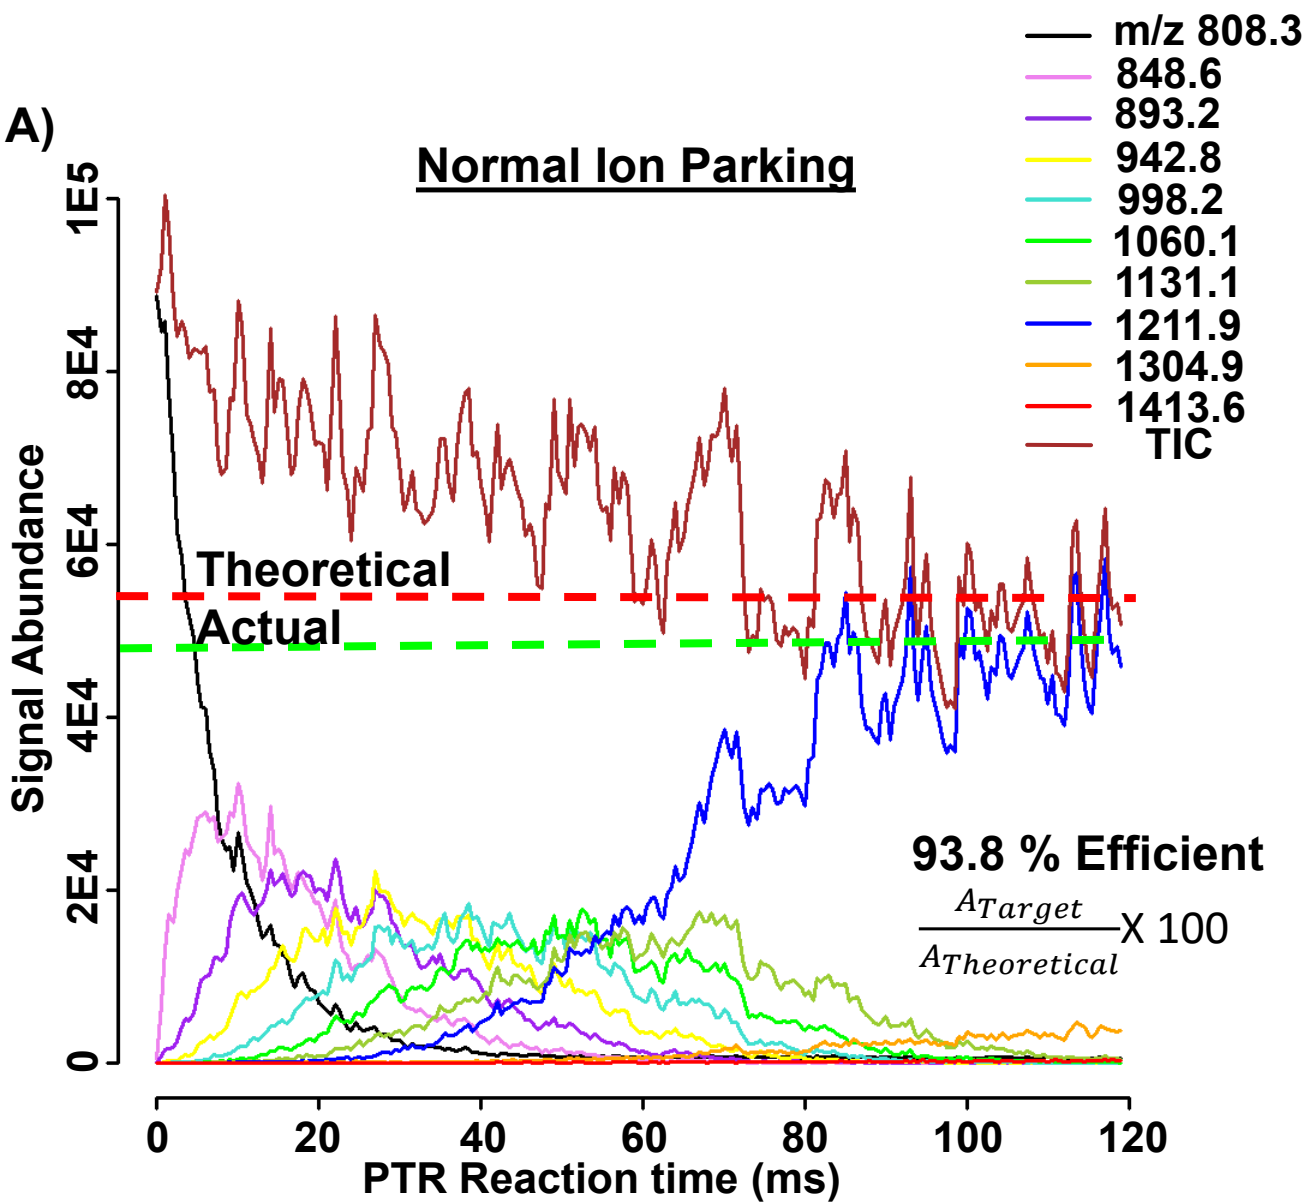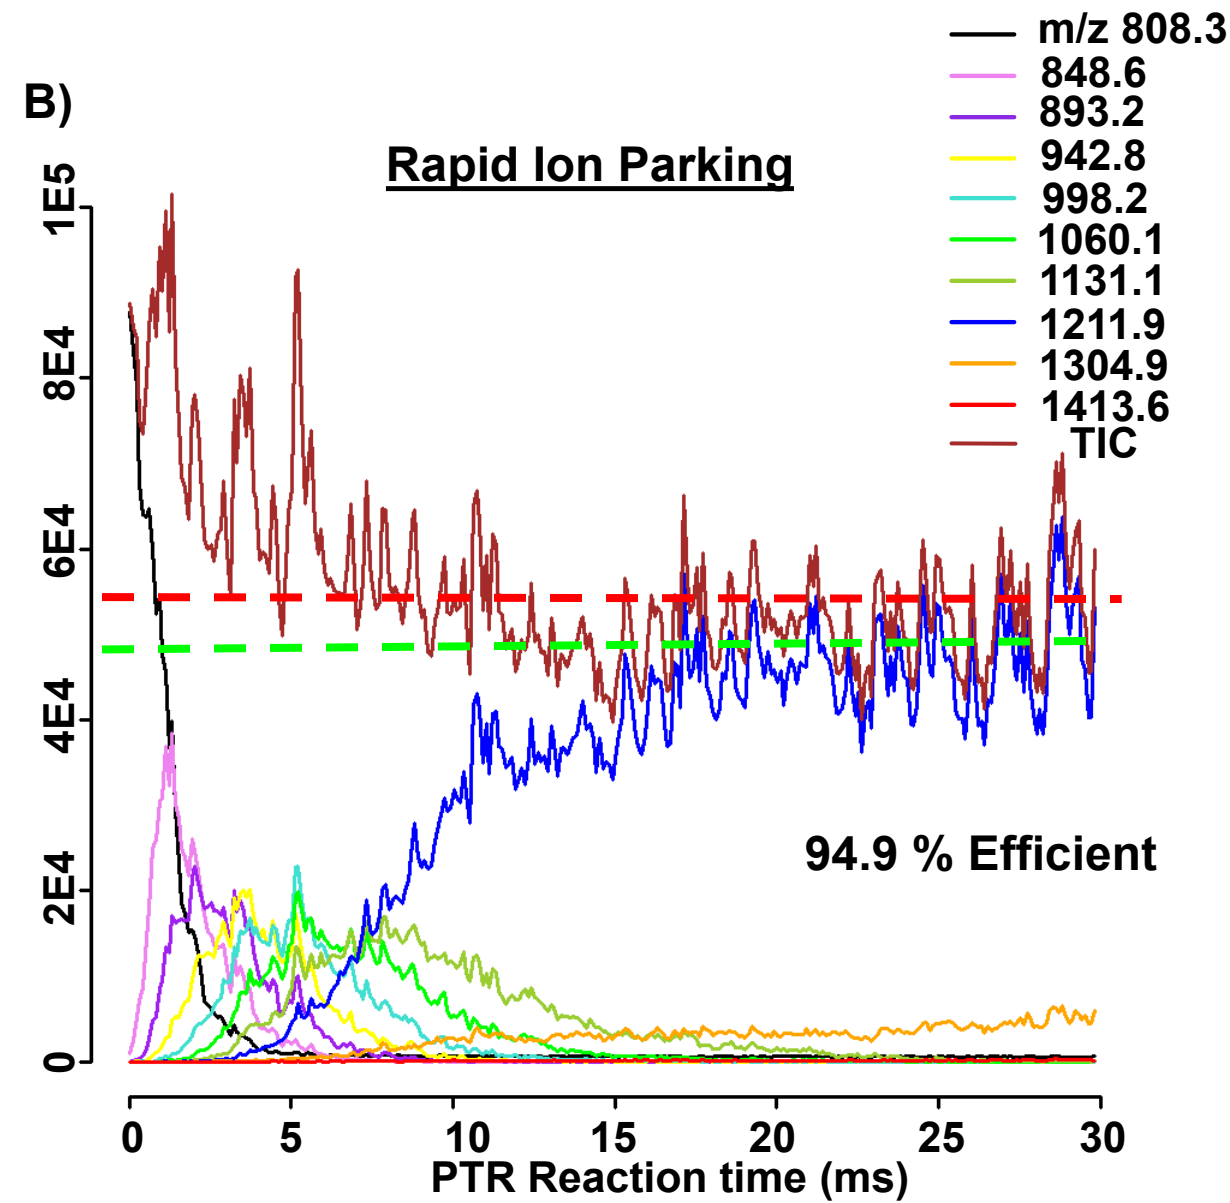

**Figure S8****A)**

Magnitude

0

276043520

 $M^{\bullet-} = \text{PFMD}$  $M^{\bullet-}$ Reagent Park Amplitude

0.000

200

400

600

800

1000

m/z

**B)**

Magnitude

0

283305312

 $M^{\bullet-}$ 

0.020

200

400

600

800

1000

m/z

**C)**

Magnitude

0

144874480

 $M^{\bullet-}-F$  $M^{\bullet-}$ 

0.065

200

400

600

800

1000

m/z

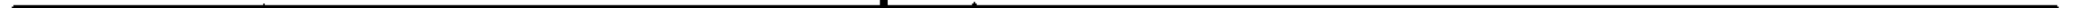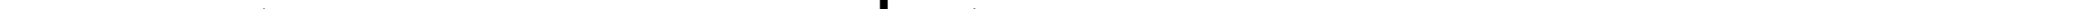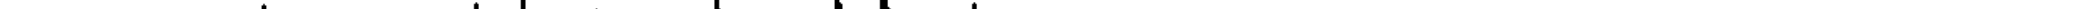

Figure S9

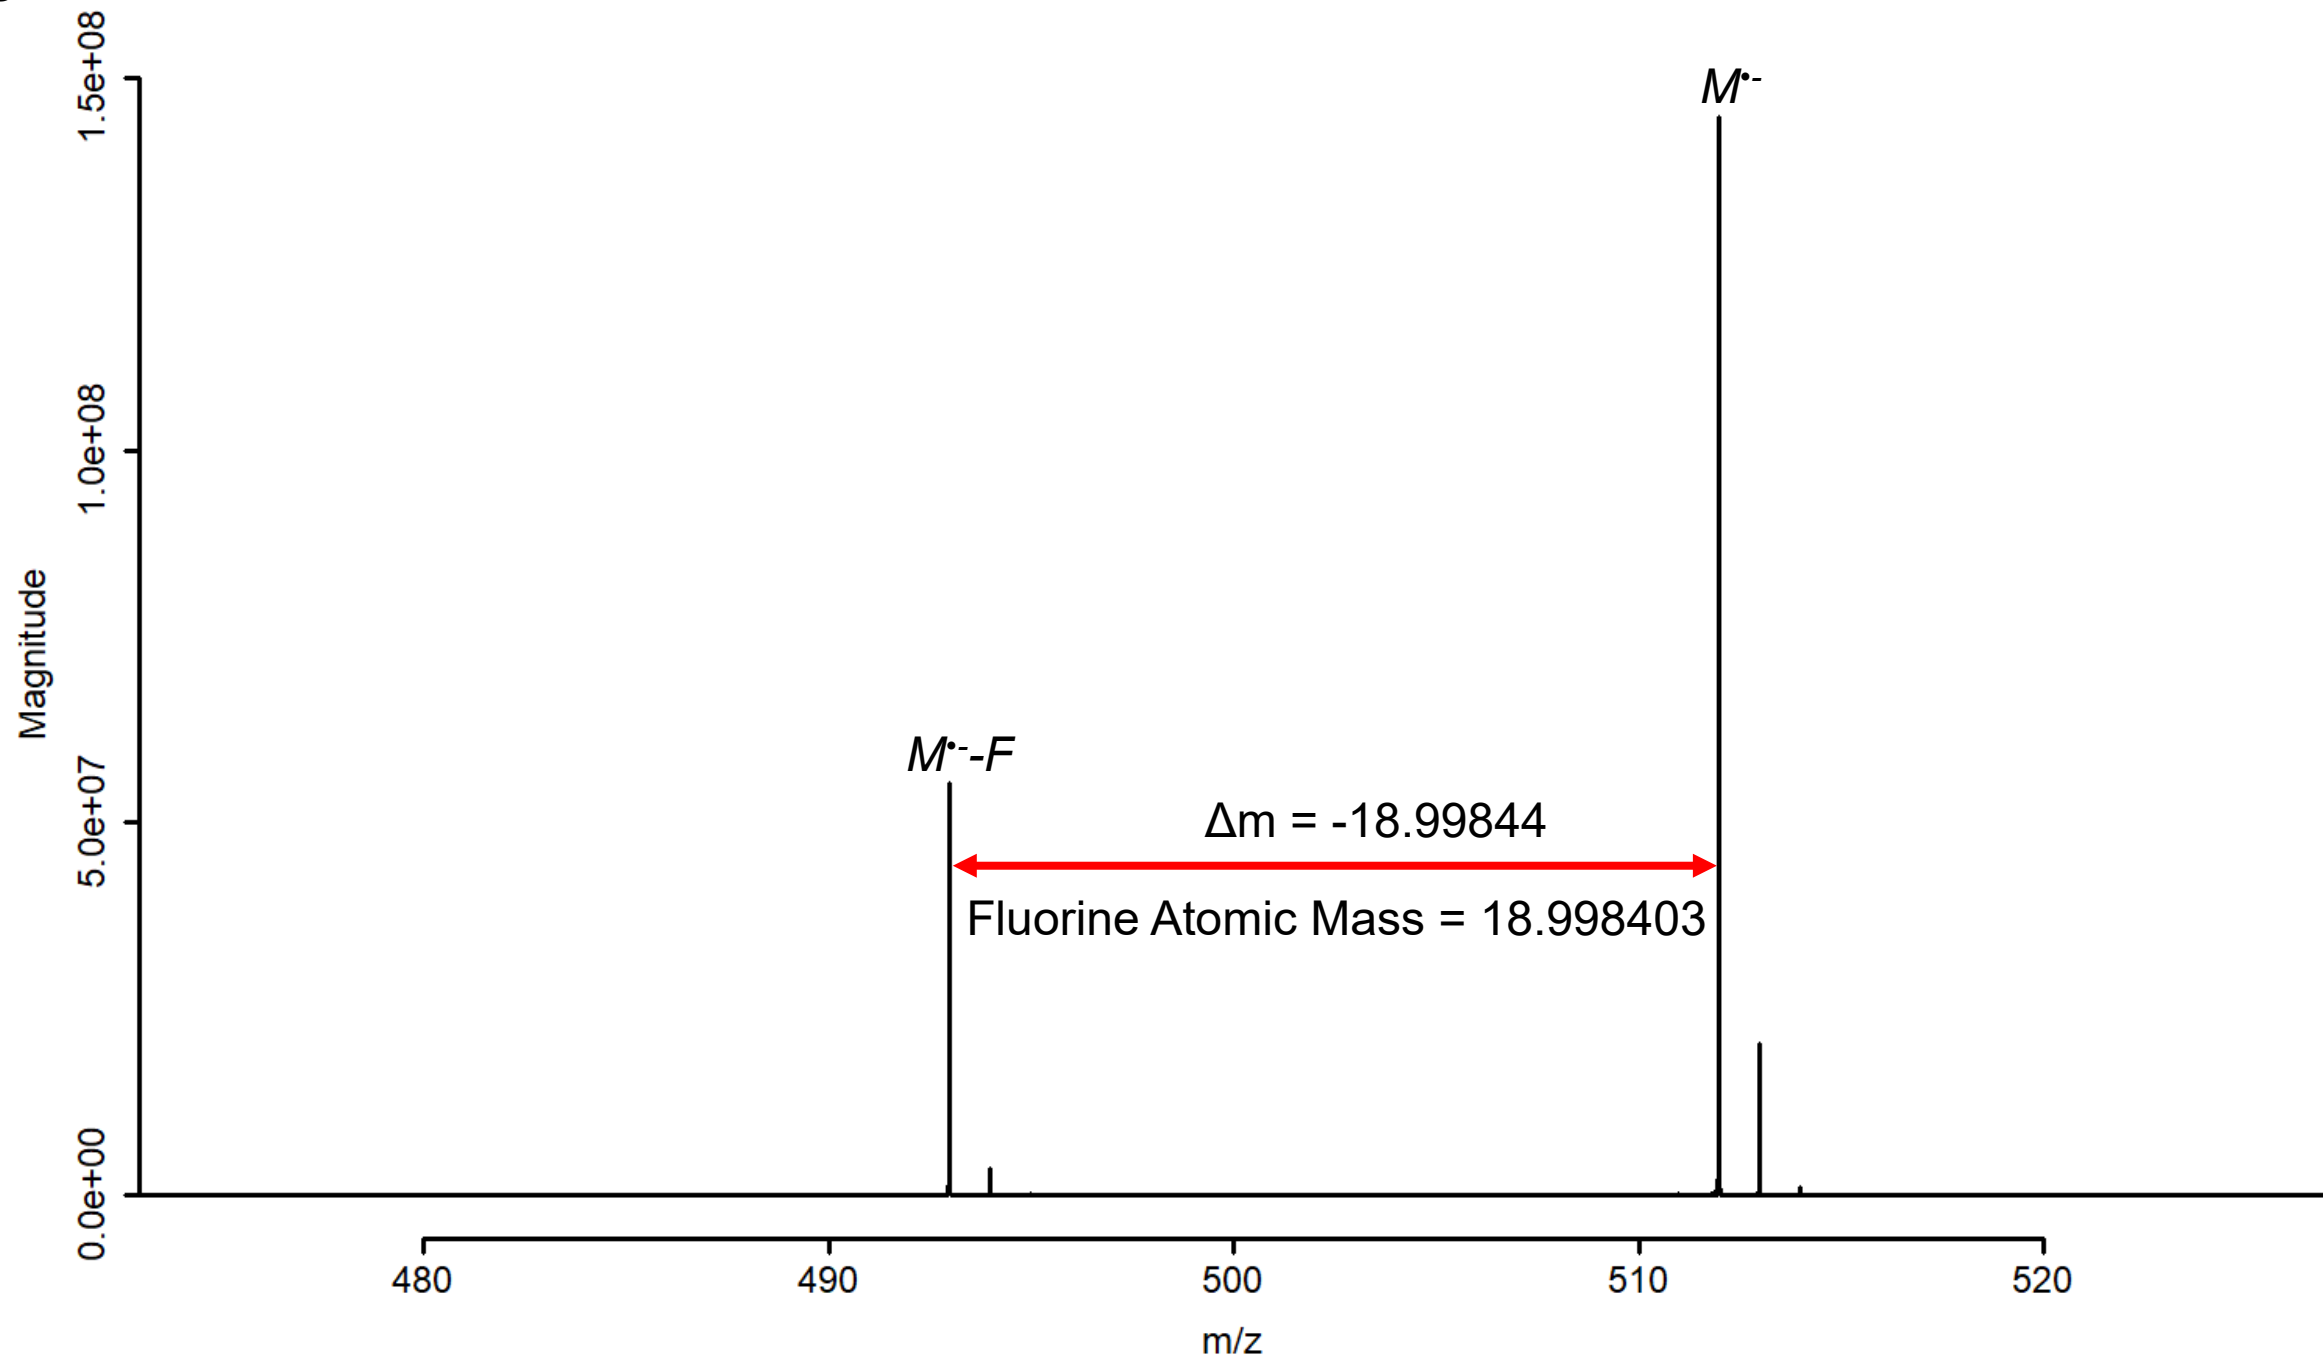

Figure S10

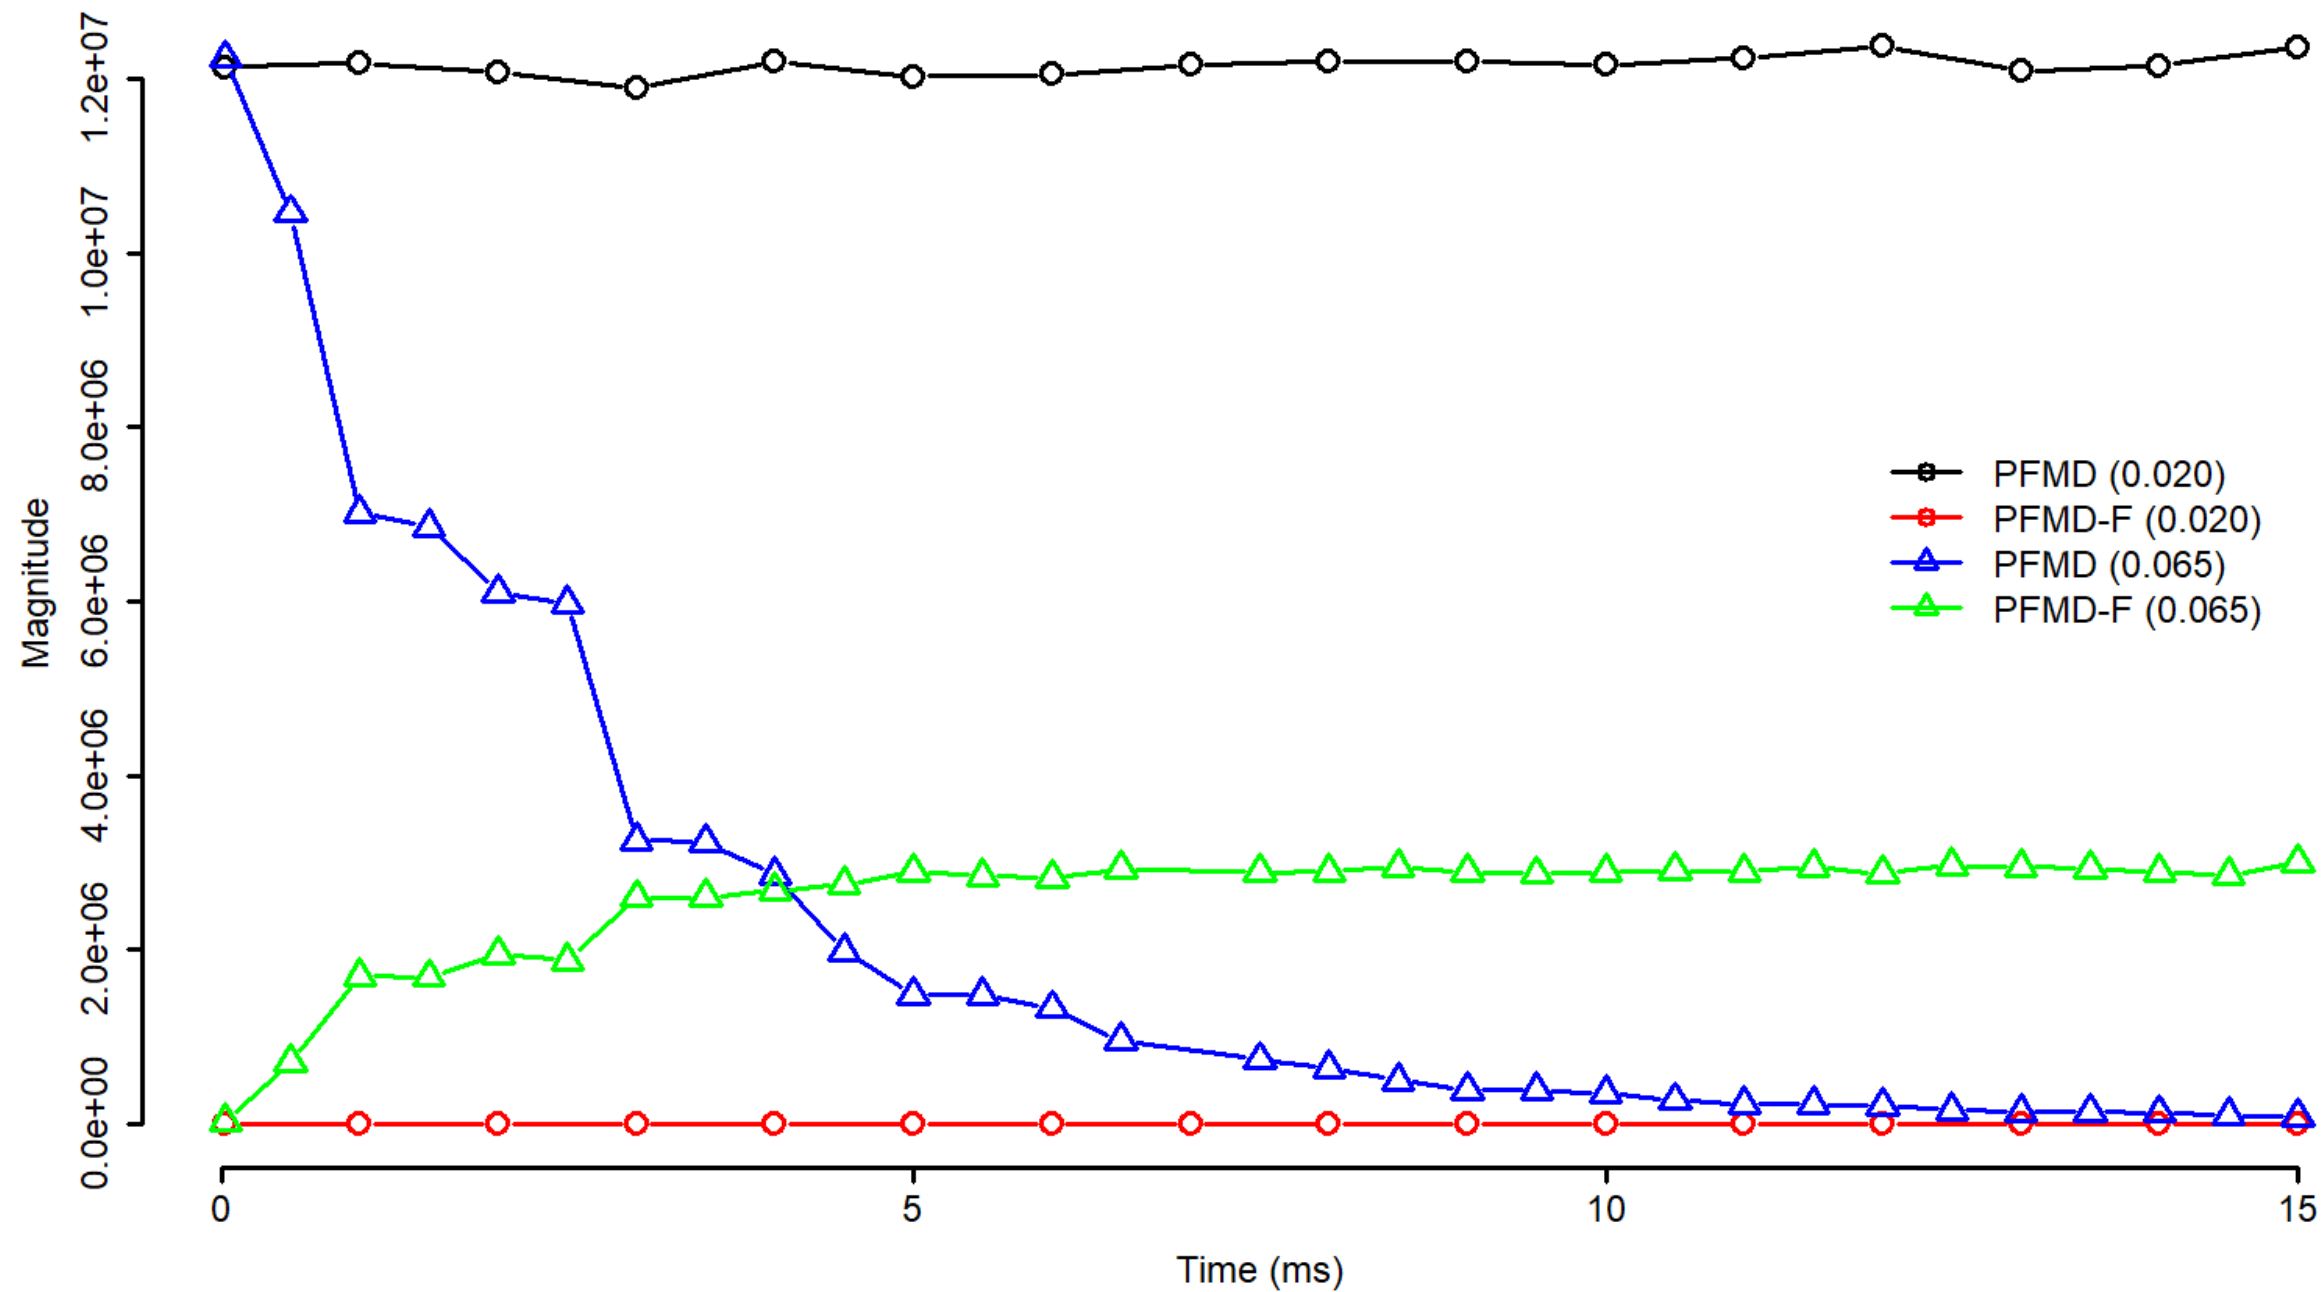

Figure S11

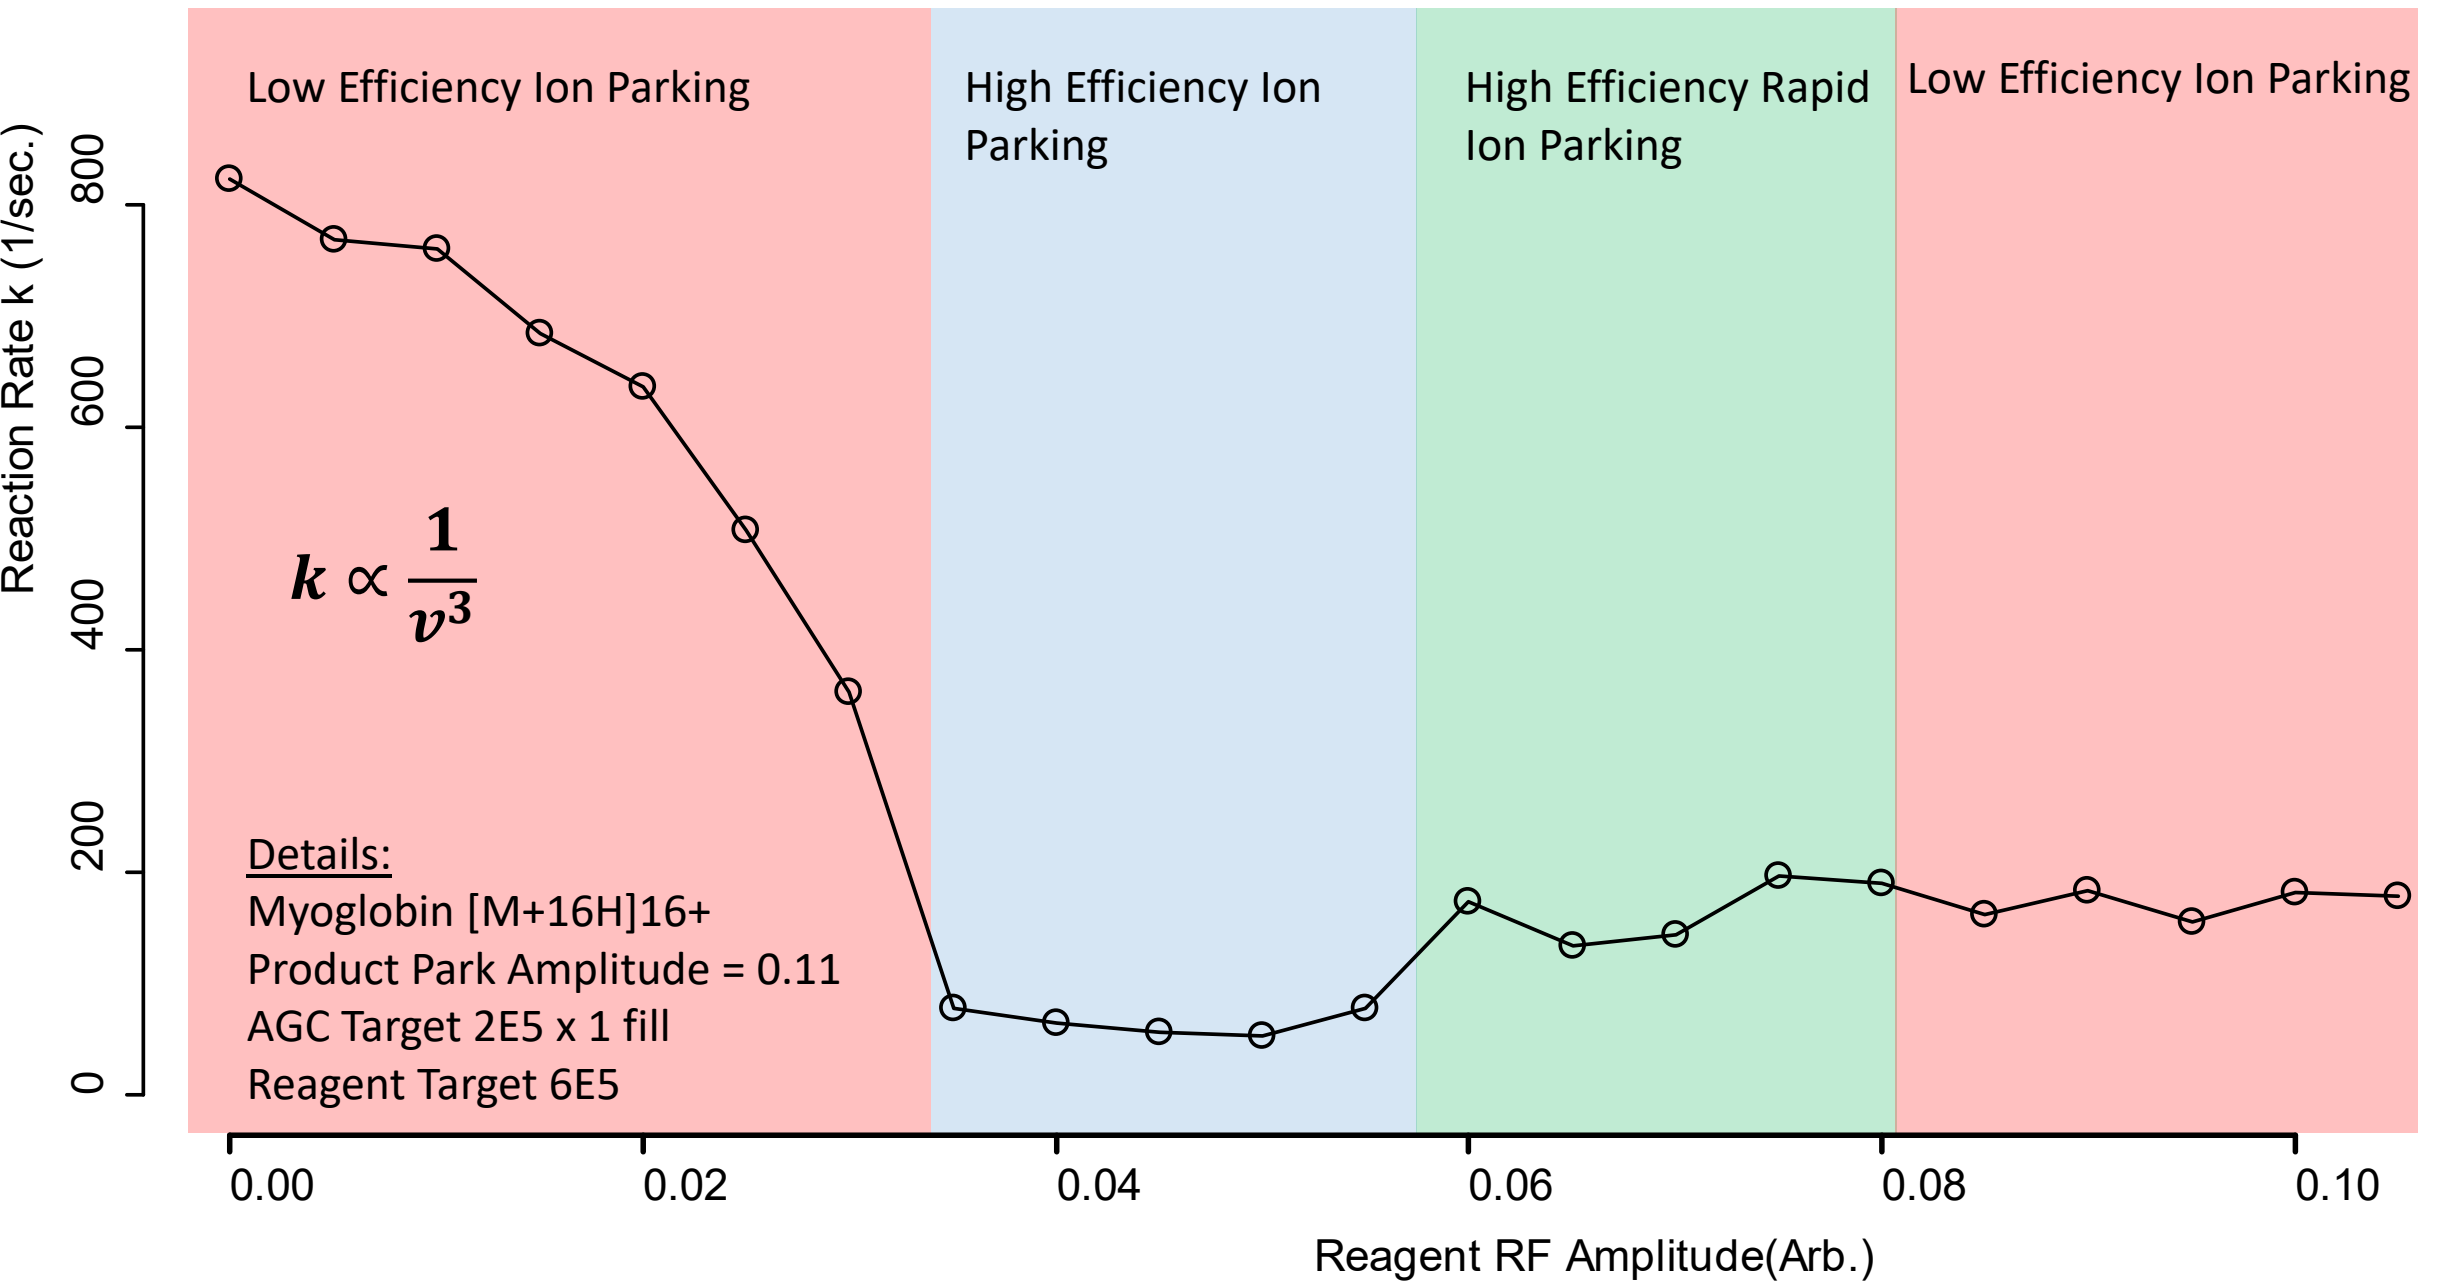

Figure S12

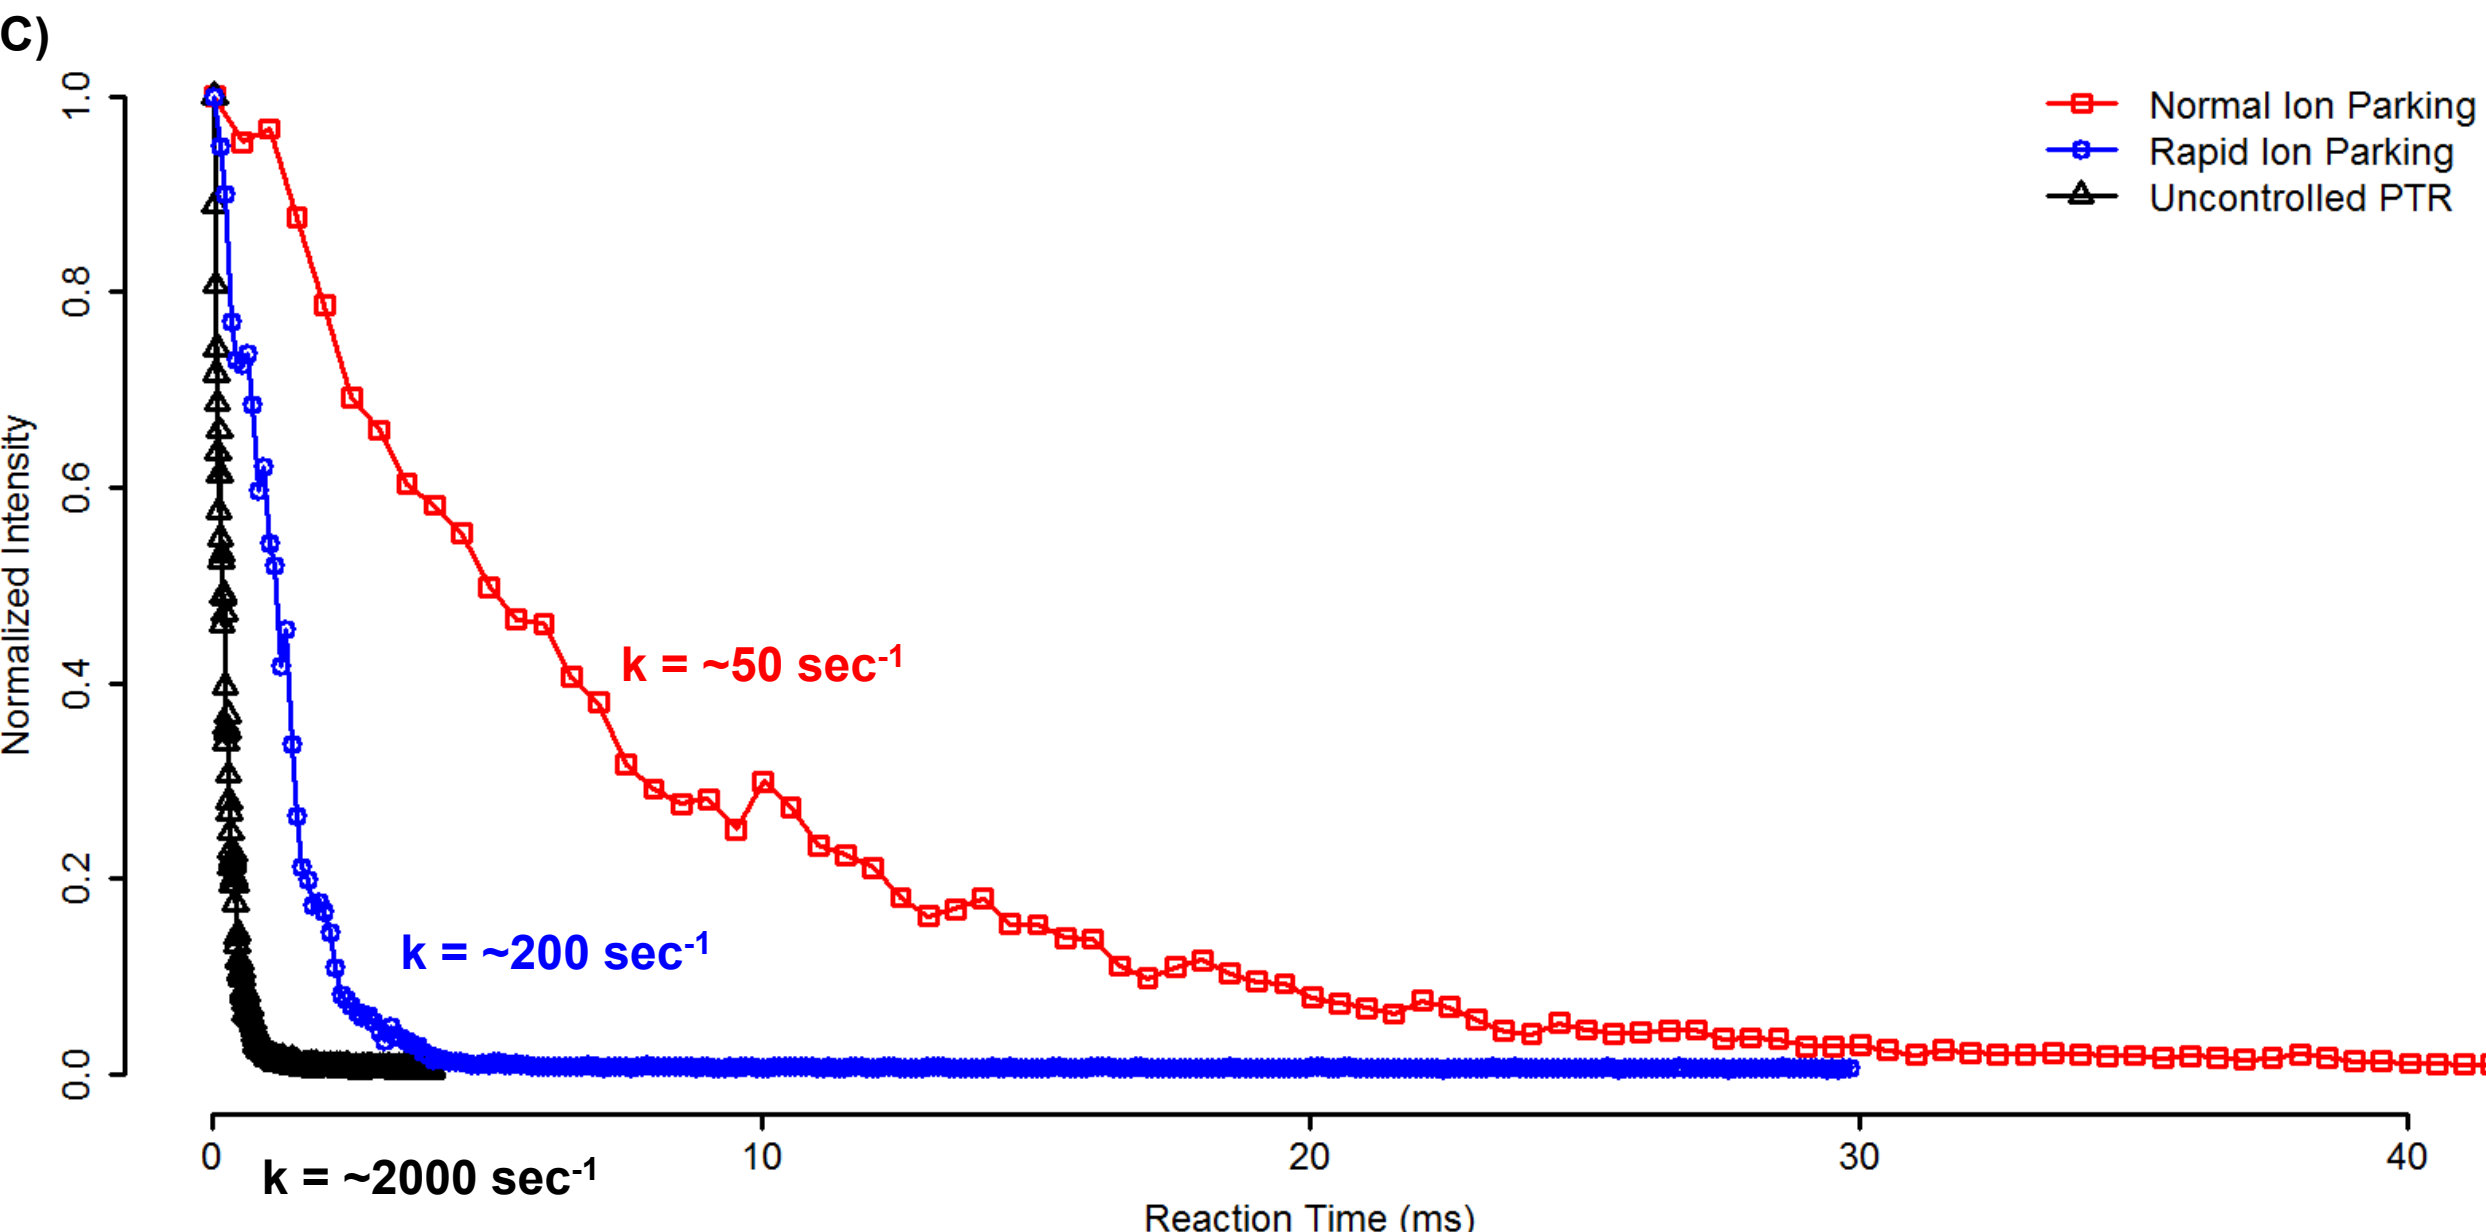

Supplement: NIHMS1730918-supplement-Supporting_Information.pdf [file NIHMS1730918-supplement-Supporting_Information.pdf]
